# Supplementary material for: Highly efficient, reversible iodine capture and exceptional uptake of amines in viologen-based porous organic polymers
Source: Royal Society of Chemistry journal article supplement (doi:10.1039/d0ra03242e), 2020-01-01
Supplement: d0ra03242e1.pdf [file d0ra03242e1.pdf]

## Supplementary Material

### **Highly efficient, reversible iodine capture and exceptional uptake of amines in one viologen-based porous organic polymers**

*Meiting Li<sup>1, 2</sup>, Huanyu Zhao<sup>1, \*</sup>, Zhong-Yuan Lu<sup>1, 2</sup>*

<sup>1</sup>State Key Laboratory of Supramolecular Structure and Materials, Jilin University, Changchun 130012, China

<sup>2</sup>Institute of Theoretical Chemistry, Jilin University, Changchun 130023, China

\*Corresponding author.

Email: zhaohuanyu@jlu.edu.cn

Tel: +86 13504437636

Email: luzhy@jlu.edu.cn

Email: mtli16@mails.jlu.edu.cn

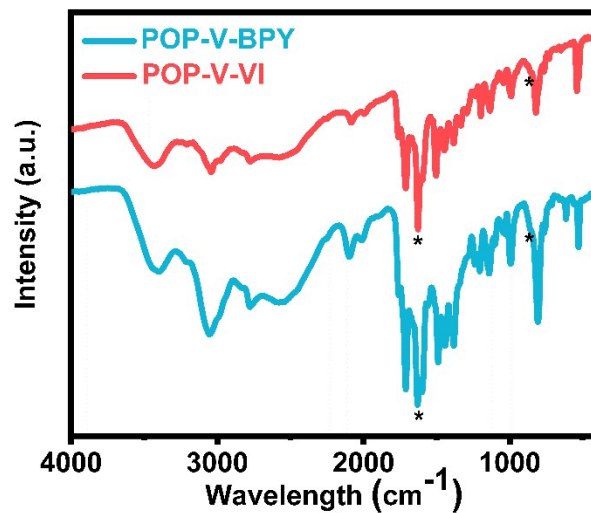

Figure S1. FTIR spectrum of POP-V-VI and POP-V-BPY.

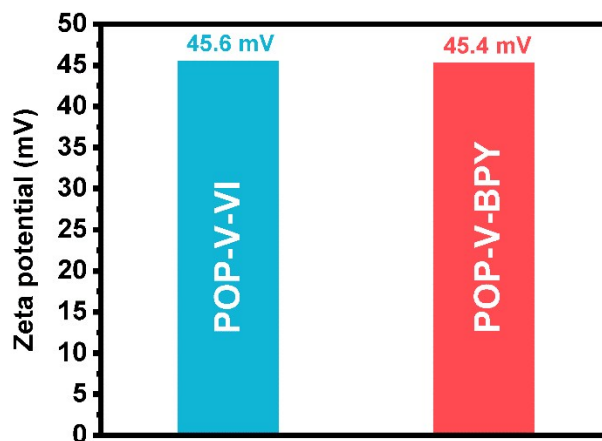

Figure S2. Zeta potential of POP-V-VI and POP-V-BPY.

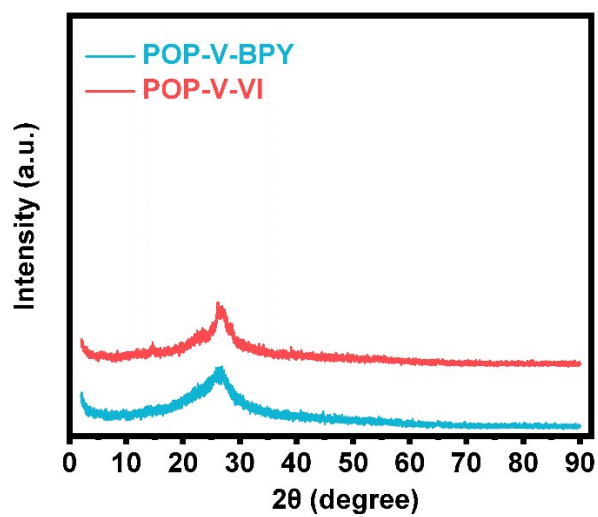

Figure S3. XRD patterns of POP-V-VI and POP-V-BPY.

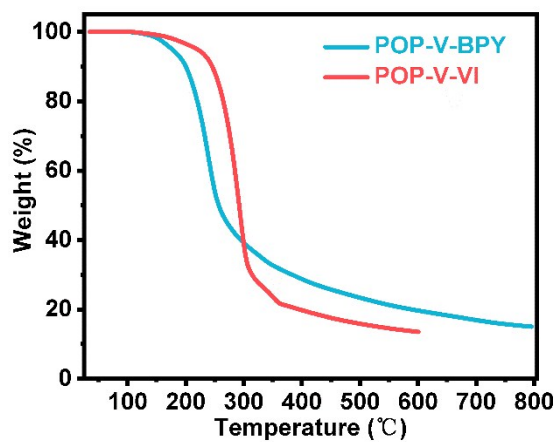

Figure S4. TGA patterns of POP-V-BPY and POP-V-VI under N<sub>2</sub>.

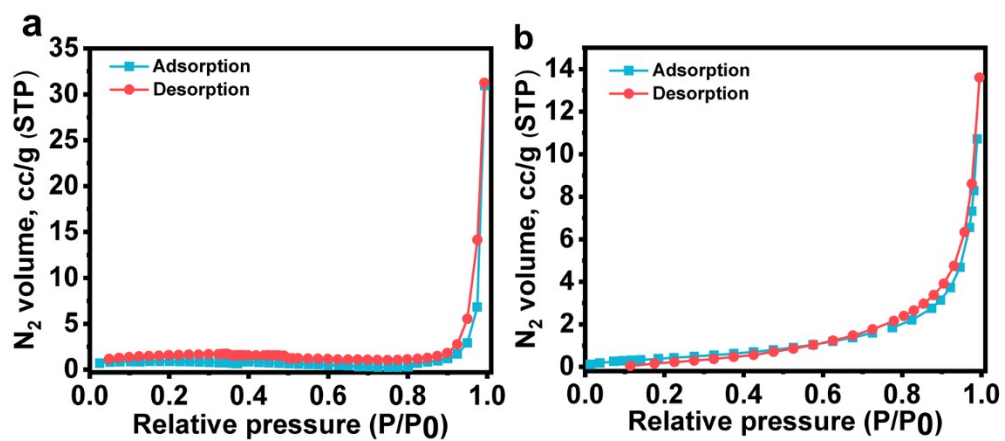

Figure S5. N<sub>2</sub> adsorption-desorption isotherms of (a) POP-V-VI and (b) POP-V-BPY.

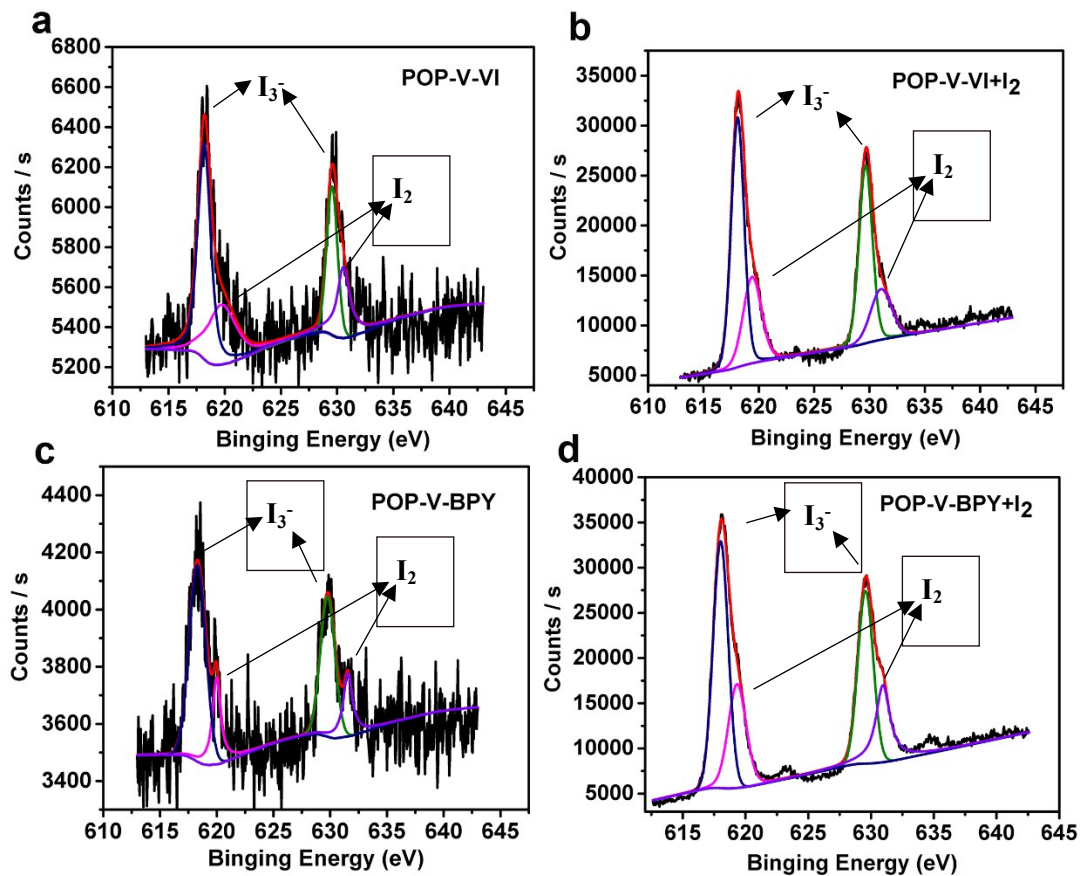

Figure S6. XPS spectrum of (a) POP-V-VI (b) POP-V-VI +  $I_2$  (c) POP-V-BPY and (d) POP-V-BPY +  $I_2$ .

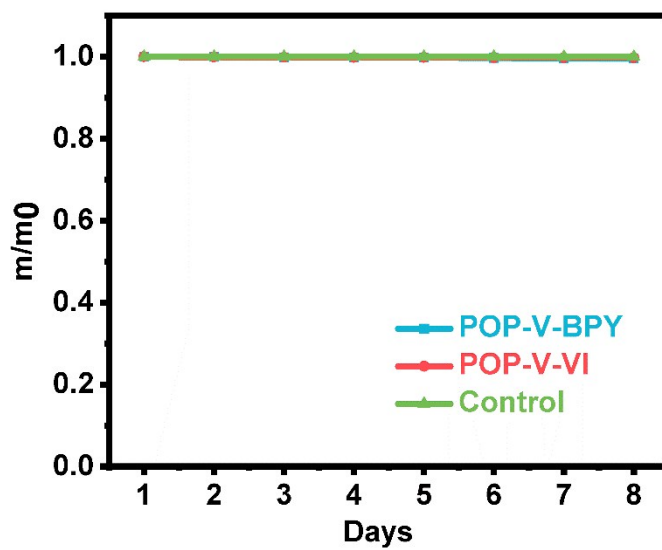

Figure S7. Stability of iodine-loaded POP-V-VI and POP-V-BPY as a function of time at room temperature.

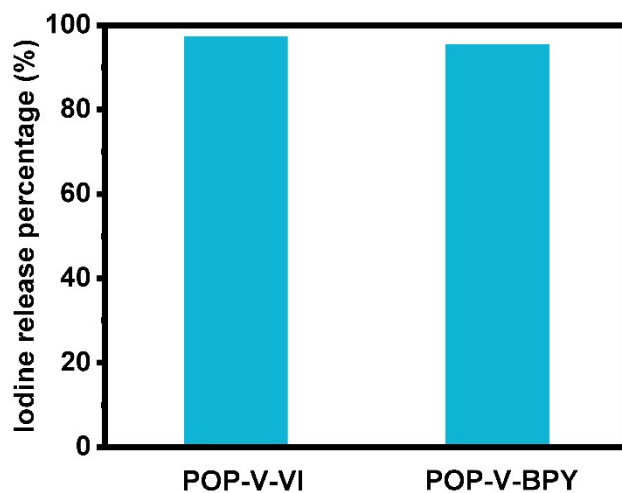

Figure S8. Iodine release from POP-V-VI and POP-V-BPY into ethanol.

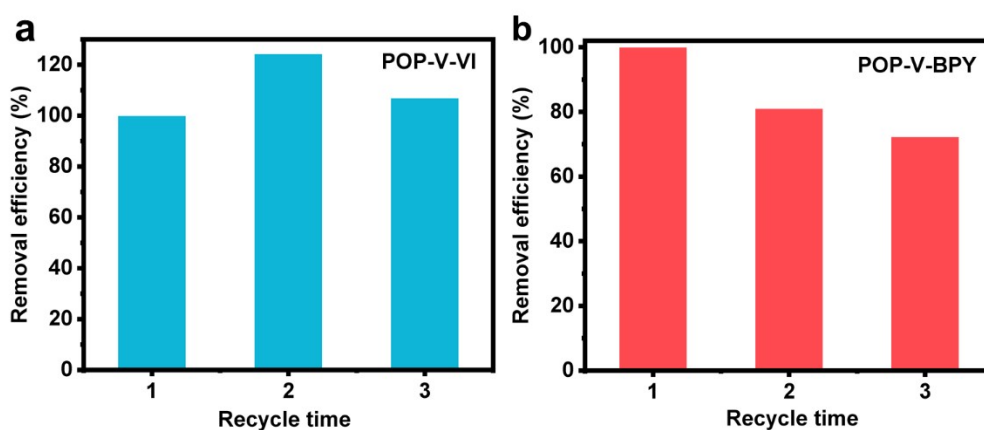

Figure S9. Recyclability of POP-V-VI and POP-V-BPY for the removal of iodine.

Table S1 Parameter comparison between two different adsorption kinetic models for the adsorption of iodine in POP-V-VI and POP-V-BPY.

| Kinetic model             |             | Model parameter                                                 |                                    |                                    |                                    |
|---------------------------|-------------|-----------------------------------------------------------------|------------------------------------|------------------------------------|------------------------------------|
|                           |             | Sample name                                                     | $K_1$ ( $\text{min}^{-1}$ )        | $Q_e$ (cal) ( $\text{mg g}^{-1}$ ) | $Q_e$ (exp) ( $\text{mg g}^{-1}$ ) |
| Pseudo-first-order model  | POP-V-VI    | 0.1067                                                          | 25.82                              | 40.41                              | 0.97249                            |
|                           | POP-V-BPY   | 0.2187                                                          | 62.63                              | 79.37                              | 0.60953                            |
|                           |             |                                                                 |                                    |                                    |                                    |
| Pseudo-second-order model | Sample name | $K_2$ ( $\text{g} \cdot \text{mg}^{-1} \cdot \text{min}^{-1}$ ) | $Q_e$ (cal) ( $\text{mg g}^{-1}$ ) | $Q_e$ (exp) ( $\text{mg g}^{-1}$ ) | $R^2$                              |
|                           | POP-V-VI    | 0.0108                                                          | 42.37                              | 40.41                              | 0.99458                            |
|                           | POP-V-BPY   | 0.0066                                                          | 84.39                              | 79.37                              | 0.99448                            |

**Table S2 Summary of iodine uptake abilities by porous materials.**

| Number | Adsorbents          | Temperature (K) | Pressure (bar) | $S_{\text{BET}}$ ( $\text{m}^2/\text{g}$ ) | Iodine uptake ( $\text{g/g}$ ) | Materials type                 | ref                                     |
|--------|---------------------|-----------------|----------------|--------------------------------------------|--------------------------------|--------------------------------|-----------------------------------------|
| 1      | CX4-NS              | 350             | 1              | 468                                        | 1.14                           | Calix[4]arene based 2D polymer | ACS.Appl.Mater.Interfaces.2018.10.17359 |
| 2      | Por-Py-CMP          | 350             | 1              | 1014                                       | 1.3                            | CMP                            | RSC.Adv.2016.6.75478                    |
| 3      | Pha-HCOP-1          | 353             | 1              | 217.31                                     | 1.31                           | COP                            | RSC.Adv.2017.7.54407                    |
| 4      | COP <sub>1</sub> ++ | 345             | 1              | 17.9                                       | 1.6                            | Covalent Organic nanosheets    | Chem.Eur.J.2018.24.8648                 |

|    |            |        |   |       |      |                    |                                               |
|----|------------|--------|---|-------|------|--------------------|-----------------------------------------------|
| 5  | TPTT       | 350    | 1 | 315.5 | 1.77 | POP                | Polym.chem.2018.9.777                         |
| 6  | NTP        | 350    | 1 | 1067  | 1.8  | POP                | ACS.Macro.Lett, 2016, 5, 1039                 |
| 7  | NOP-54     | 348    | 1 | 1178  | 2.02 | POP                | Chemical.Engineering.Journal.334.2018.900     |
| 8  | NiP-CMP    | 350    | 1 | 2600  | 2.02 | CMP                | Chem.Commun.2014.50.8495                      |
| 9  | CMPN-3     | 343.3  | 1 | 1386  | 2.08 | CMP                | J.Mater.Chem.A.2015.3.87                      |
| 10 | NCMP-1     | 358    | 1 | 58    | 2.15 | CMP                | ACS.Appl.Mater.Interfaces.2017.9.38390-38400  |
| 11 | APOP       | 350    | 1 | 490   | 2.2  | POP                | Materials.Letters.229.2018.240-243            |
| 12 | SCMP-2     | 350    | 1 | 855   | 2.22 | CMP                | ACS.Appl.Mater.Interfaces.2016.8.21063        |
| 13 | NRPP-2     | 360    | 1 | 1028  | 2.22 | POP                | Acs.Appl.Mater.Interfaces.2018.10.16049-16058 |
| 14 | Azo-Trip   | 350    | 1 | 510.4 | 2.38 | POP                | Polym.chem.2016.7.643                         |
| 15 | PAF-24     | 350    | 1 | 136   | 2.76 | PAF                | Angew.Chem.Int.Ed.2015.54.12733               |
| 16 | AzoPPN     | 350    | 1 | 400   | 2.9  | POP                | Chem.Eur.J.2016.22.11863                      |
| 17 | HCMP-3     | 358.15 | 1 | 50    | 3.36 | CMP                | Macromolecules.2016.49.6322-6333              |
| 18 | CTF-CTTD   | 348    | 1 | 1684  | 3.87 | POF                | Ind.Eng.Chem.Res.2018.57.15114                |
| 19 | POP-V-BPY  | 350    | 1 | 10    | 4.2  | POP                | In this work                                  |
| 20 | ADB-S      | 350    | 1 | 41.53 | 4.43 | POP                | Chem.Asian.J.2018.13.2046                     |
| 21 | TTPB       | 350    | 1 | 222   | 4.43 | CMP                | J.mater.chem. A. 2017, 5.7612                 |
| 22 | TatPOP-2   | 350    | 1 | 36.5  | 4.5  | CMP                | Chem.commun.2018.54.8450                      |
| 23 | COF-DL229  | 350    | 1 | 1762  | 4.7  | 3D-COF             | Chem.Eur.J, 2018,24,585                       |
| 24 | CalPOF-1   | 350    | 1 | 303   | 4.77 | POF                | ACS.Sustainable.Chem.Eng.2018.6.17402         |
| 25 | SIOC-COF-7 | 350    | 1 | 618   | 4.81 | COF                | Chem.Commun.2017.53.7266                      |
| 26 | PSIF-1a    | 350    | 1 | 320   | 4.85 | Porous silsesquiox | Acs.Appl.Mater.Interface.2018.10.19964        |

|           |                              |            |          |             |             |                                       |                                     |
|-----------|------------------------------|------------|----------|-------------|-------------|---------------------------------------|-------------------------------------|
|           |                              |            |          |             |             | <b>ane-imine<br/>Framework<br/>ks</b> |                                     |
| <b>27</b> | <b>POP-V-<br/>VI</b>         | <b>350</b> | <b>1</b> | <b>10</b>   | <b>4.86</b> | <b>POP</b>                            | <b>In this work</b>                 |
| <b>28</b> | <b>TPT-BD<br/>COF</b>        | <b>350</b> | <b>1</b> |             | <b>5.43</b> | <b>COF</b>                            | <b>Chem.Mater.2018.30.2299-2308</b> |
| <b>29</b> | <b>TPB-<br/>DMTP<br/>COF</b> | <b>350</b> | <b>1</b> | <b>1927</b> | <b>6.26</b> | <b>COF</b>                            | <b>Adv.Mater.2018.30.1801991</b>    |
